# Supplementary material for: TADCompare: An R Package for Differential and Temporal Analysis of Topologically Associated Domains
Source: Front Genet. 2020 Mar 10;11:158. doi: 10.3389/fgene.2020.00158 (PMC7076128; doi:10.3389/fgene.2020.00158)
Supplement: Supplementary Table 4 — Gene ontology enrichment for differential boundary types. Differential boundaries were identified between the neural progenitor cells (NPC) and mesenchymal stem cells (MSC) (Schmitt et al., 2016). Pathway analysis was performed using rGREAT (Methods), and results are separated by ontology. Boundaries with an FDR adjusted p-value of <0.3 are shown. 40 kb resolution, chr 1–22. [file Table_4.XLSX]

## Sheet: GO Biological Process
Description	Complex	Merge	Non-Differential	Shifted	Split	Strength Change
positive regulation of axon extension involved in axon guidance	0.115249	0.0226536	0.0915671	0.180532	0.176093	0.126663
anatomical structure morphogenesis	0.00198074	0.00132797	0.00101301	0.087631	0.670566	0.0773706
cellular component morphogenesis	0.00113996	0.00334028	0.00651934	0.201879	0.53585	0.126546
cell development	0.000994104	0.0117711	0.00651934	0.087631	0.670566	0.126663
multicellular organismal development	0.0222466	0.0117711	0.000226264	0.107108	0.670566	0.156279
tissue development	0.0161009	0.00220234	0.00010316	0.087631	0.670566	0.242527
cell differentiation	0.0110257	0.00306614	0.00156411	0.188833	0.670566	0.145151
cell part morphogenesis	0.00113996	0.0255677	0.0171042	0.315667	0.53585	0.126546
nervous system development	0.00721428	0.00207944	0.000537794	0.189736	0.670566	0.156279
developmental process	0.0283982	0.0272215	0.000544873	0.107108	0.670566	0.192635
anatomical structure development	0.00822398	0.00765485	0.000165371	0.208017	0.670566	0.156279
cell morphogenesis involved in differentiation	0.00136502	0.0237748	0.0218997	0.183226	0.670566	0.167886
cell projection organization	0.00136502	0.0967403	0.0357959	0.180532	0.635576	0.126546
system development	0.00342239	0.00323469	0.000165371	0.274826	0.670566	0.155483
cellular developmental process	0.0113869	0.00334028	0.00112996	0.237974	0.752602	0.145151
neuron differentiation	0.00168697	0.0207951	0.024588	0.242866	0.670566	0.194065
multicellular organism growth	0.0671505	0.0419307	0.268235	0.087631	0.453468	0.242527
cell morphogenesis	0.00224009	0.0130963	0.0207437	0.292846	0.670566	0.167886
neurogenesis	0.00113996	0.00765485	0.027166	0.276345	0.670566	0.197756
organ development	0.0110257	0.010934	0.00485613	0.358018	0.670566	0.156279
cell morphogenesis involved in neuron differentiation	0.00198074	0.0967403	0.0472918	0.242866	0.670566	0.156279
nucleoside monophosphate metabolic process	0.0630318	0.107084	0.490103	0.237974	0.176093	0.156279
cell projection morphogenesis	0.00195638	0.04412	0.0208663	0.415644	0.670566	0.145151
skeletal system development	0.0630318	0.153222	0.00010316	0.087631	0.670566	0.326885
neuron projection morphogenesis	0.00243627	0.107084	0.0598932	0.409277	0.670566	0.156279
organ morphogenesis	0.00198074	0.0010629	0.0388009	0.087631	0.683044	0.598339
neuron development	0.00113996	0.078934	0.100445	0.397103	0.670566	0.194065
multicellular organismal process	0.0689499	0.0170894	0.00197229	0.547231	0.670566	0.156279
axonogenesis	0.00236046	0.213114	0.040309	0.401718	0.670566	0.192635
neuron projection development	0.00109728	0.206894	0.0938967	0.392049	0.670566	0.156279
regulation of cell communication	0.122123	0.0267831	0.123377	0.237974	0.850262	0.172825
regulation of signaling	0.0161009	0.0809025	0.147834	0.154376	0.989214	0.155483
activation of adenylate cyclase activity by G-protein signaling pathway	0.115249	0.212123	0.18354	0.237974	0.53585	0.312079
embryonic morphogenesis	0.0117936	0.00152977	0.0166309	0.242866	1	0.436487
cartilage development	0.184207	0.386105	0.0145104	0.240612	0.670566	0.242527
regulation of cell activation	0.116193	0.0166639	0.167374	0.743992	0.536795	0.167886
cyclic nucleotide metabolic process	0.0538233	0.218785	0.410474	0.237974	0.53585	0.322893
muscle tissue development	0.0607409	0.611852	0.00458193	0.217142	0.643326	0.242527
anatomical structure formation involved in morphogenesis	0.183262	0.0117711	0.00090874	0.552495	0.683044	0.367254
positive regulation of response to stimulus	0.0788696	0.063223	0.614758	0.237974	0.670566	0.156279
hair cycle	0.0374611	0.354999	0.252383	0.472123	0.536795	0.194065
regulation of leukocyte activation	0.0814159	0.0117711	0.255621	0.851383	0.53585	0.156279
axon guidance	0.0222466	0.292915	0.0498118	0.743992	0.670566	0.156279
regulation of cell proliferation	0.0678964	0.050303	0.00458193	0.645907	0.728537	0.473522
pattern specification process	0.0144685	0.00207944	0.0915671	0.237974	0.989221	0.653645
negative regulation of systemic arterial blood pressure	0.575957	0.205693	0.0280355	0.208017	0.536795	0.435226
myeloid cell differentiation	0.516384	0.0010629	0.331071	0.536203	0.453468	0.156279
enzyme linked receptor protein signaling pathway	0.0659039	0.0413778	0.394262	0.242866	0.670566	0.624101
tissue morphogenesis	0.163757	0.00438664	0.00312971	0.087631	0.995528	0.843187
positive regulation of biological process	0.0341458	0.0704505	0.00312971	0.23107	1	0.766913
cardiac ventricle morphogenesis	0.195252	0.195864	0.334262	0.0954285	0.670566	0.652004
embryo development	0.0113869	0.00525618	0.0916286	0.242866	1	0.799318
activation of adenylate cyclase activity	0.115249	0.286469	0.362515	0.389423	0.53585	0.473522
regulation of response to stimulus	0.115249	0.142896	0.345573	0.242866	1	0.323089
positive regulation of molecular function	0.0840644	0.374333	0.136379	0.645907	0.752602	0.194065
cardiac ventricle development	0.238995	0.120563	0.188796	0.205135	0.670566	0.767035
generation of neurons	0.0065284	0.0178646	0.0561194	0.632841	1	0.479273
positive regulation of adenylate cyclase activity	0.122123	0.298834	0.377383	0.397103	0.53585	0.473522
cyclic-nucleotide-mediated signaling	0.280232	0.120422	0.130551	0.638532	0.53585	0.502342
positive regulation of transcription from RNA polymerase II promoter	0.0065284	0.241047	0.0166309	0.183574	1	0.766913
regulation of signal transduction	0.0460499	0.266724	0.269948	0.205123	1	0.435226
central nervous system development	0.115249	0.0563936	0.00458193	0.2897	1	0.764519
chemotaxis	0.0629973	0.120422	0.178995	0.778217	0.850262	0.242527
positive regulation of cyclase activity	0.130371	0.307834	0.397632	0.408721	0.53585	0.473522
tube development	0.0814159	0.00207944	0.0235642	0.205135	0.947905	1
positive regulation of cell activation	0.122123	0.101959	0.203579	1	0.670566	0.167886
striated muscle tissue development	0.0659039	0.849246	0.00458193	0.242866	0.670566	0.436422
forebrain development	0.189286	0.00207944	0.00651934	0.627609	0.823924	0.626351
positive regulation of leukocyte activation	0.107971	0.0918561	0.26722	1	0.670566	0.156279
transmembrane receptor protein tyrosine kinase signaling pathway	0.0594521	0.0756036	0.452178	0.240612	0.670566	0.812617
heart morphogenesis	0.0564679	0.0272215	0.0592908	0.180532	1	1
signaling	0.155783	0.0686844	0.364405	0.418576	0.670566	0.655924
positive regulation of lyase activity	0.145766	0.329638	0.423893	0.422009	0.53585	0.479382
regulation of axon extension involved in axon guidance	0.280232	0.25697	0.052523	0.653731	0.643326	0.473522
cardiac chamber morphogenesis	0.167964	0.354999	0.127569	0.237974	0.670566	0.843187
cell surface receptor linked signaling pathway	0.301959	0.00276241	0.644355	0.087631	0.670566	0.704095
positive regulation of cellular process	0.0155693	0.0809025	0.00198426	0.552495	1	0.766913
cAMP-mediated signaling	0.158352	0.120422	0.490103	0.549918	0.536795	0.570195
positive regulation of nucleobase-containing compound metabolic process	0.0114102	0.240729	0.00458193	0.487203	1	0.686845
signal transduction	0.115249	0.101493	0.403858	0.418294	0.670566	0.766913
regulation of transcription from RNA polymerase II promoter	0.00678656	0.0367662	0.0207437	0.645907	1	0.766913
hemopoiesis	0.520609	0.00473454	0.0682704	0.68731	0.728537	0.473522
hemopoietic or lymphoid organ development	0.325477	0.00207944	0.0405689	0.704125	0.850262	0.570195
cell communication	0.177981	0.0967403	0.307791	0.552495	0.670566	0.704095
mesenchyme development	0.280232	0.0274258	0.0598932	0.154376	1	1
positive regulation of nitrogen compound metabolic process	0.0174804	0.266724	0.00458193	0.552495	1	0.704095
ventricular cardiac muscle cell differentiation	0.213182	0.374333	0.178995	0.473582	0.670566	0.652004
brain development	0.151503	0.00928641	0.00498127	0.712523	0.850262	0.843187
cardiac chamber development	0.238995	0.205693	0.186455	0.298428	0.728537	0.914107
circulatory system process	0.273186	0.341094	0.0733254	0.645907	0.670566	0.570195
toll-like receptor 1 signaling pathway	0.151503	0.339194	0.644355	0.44071	0.53585	0.486183
toll-like receptor 2 signaling pathway	0.151503	0.339194	0.644355	0.44071	0.53585	0.486183
morphogenesis of an epithelium	0.389944	0.00220234	0.0838541	0.154376	1	1
limb morphogenesis	0.0295269	0.0967403	0.0333122	0.472123	1	1
positive regulation of cellular component organization	0.0686121	0.023909	0.368919	1	0.670566	0.502342
locomotion	0.320465	0.0272351	0.155275	0.645907	1	0.502342
MyD88-dependent toll-like receptor signaling pathway	0.0988294	0.374333	0.664109	0.473582	0.536795	0.525331
epithelium development	0.102653	0.00220234	0.0126233	0.571473	1	1
positive regulation of immune system process	0.0810167	0.192286	0.644355	0.995441	0.53585	0.254173
Notch signaling pathway	0.563286	0.0274258	0.505453	0.183226	0.670566	0.766913
mesenchymal cell differentiation	0.422972	0.043136	0.100445	0.154376	1	1
G-protein signaling, coupled to cAMP nucleotide second messenger	0.439051	0.0809025	0.527555	0.645907	0.53585	0.493279
regulation of developmental process	0.0980089	0.00207944	0.0189666	0.627609	1	0.98799
positive regulation of developmental process	0.175824	0.0010629	0.14429	0.653731	1	0.766913
cellular response to chemical stimulus	0.685314	0.0182281	0.251634	0.552495	0.670566	0.570195
cellular response to organic substance	0.686022	0.0833877	0.233496	0.473582	0.670566	0.609464
regulation of molecular function	0.0659039	0.245891	0.20066	0.753599	1	0.502342
limb development	0.0507516	0.120422	0.0558135	0.549918	1	1
positive regulation of signal transduction	0.0507516	0.202144	0.896259	0.298428	1	0.367254
regionalization	0.0689499	0.0166639	0.259026	0.473582	1	1
regulation of multicellular organismal process	0.0631265	0.00404847	0.0784449	0.67515	1	1
regulation of developmental growth	0.184866	0.453083	0.0637448	0.397103	0.755547	0.98799
regulation of cellular component organization	0.102653	0.266724	0.0203905	0.473582	0.995528	1
positive regulation of gene expression	0.00859303	0.436368	0.00369002	0.645907	1	0.766913
cellular response to hormone stimulus	0.575957	0.374333	0.490103	0.473582	0.670566	0.278376
positive regulation of cell differentiation	0.294211	0.000542873	0.0973808	0.712523	1	0.766913
intracellular receptor mediated signaling pathway	0.472819	0.205693	0.691885	0.653731	0.670566	0.194065
immune system development	0.372471	0.00207944	0.0558135	0.823147	0.989221	0.653645
digestive tract development	0.12367	0.110878	0.0166309	0.645907	1	1
hair follicle development	0.0689499	0.611753	0.423893	0.645907	0.670566	0.479382
endochondral bone morphogenesis	0.311009	0.611753	0.265251	0.087631	0.752602	0.875407
embryonic limb morphogenesis	0.0467952	0.050303	0.126709	0.680737	1	1
regulation of cellular process	0.158352	0.25697	0.0431766	0.447612	1	1
positive regulation of cell proliferation	0.132141	0.054224	0.00762601	1	0.947905	0.766913
heart development	0.150026	0.121764	0.0189666	0.645907	1	1
Toll signaling pathway	0.115249	0.374333	0.759604	0.549918	0.568676	0.570195
regulation of localization	0.322611	0.0166639	0.0145104	1	1	0.609464
toll-like receptor 4 signaling pathway	0.203975	0.374333	0.729079	0.536203	0.565121	0.560743
positive regulation of transcription, DNA-dependent	0.0065284	0.440316	0.00494232	0.72069	1	0.814643
muscle structure development	0.0686121	0.266724	0.0558135	0.627609	1	0.96869
cardiovascular system development	0.311009	0.120635	0.00526371	0.552495	1	1
negative regulation of biological process	0.391258	0.0272351	0.00625493	1	0.850262	0.723662
cellular response to endogenous stimulus	0.583695	0.533385	0.107604	0.636476	0.670566	0.473522
cellular response to stimulus	0.280232	0.0971911	0.410474	0.680737	0.670566	0.875407
positive regulation of cell communication	0.0689499	0.266724	0.764887	0.44071	1	0.473522
regulation of anatomical structure morphogenesis	0.203975	0.0288103	0.136379	0.645907	1	1
hair follicle morphogenesis	0.167964	0.507057	0.362515	1	0.670566	0.312079
regulation of cellular biosynthetic process	0.115249	0.218703	0.0166309	0.743992	1	0.926456
positive regulation of signaling	0.0738472	0.266724	0.764887	0.448141	1	0.473522
digestive system development	0.177456	0.145225	0.0257734	0.68994	1	1
response to external stimulus	0.0836303	0.04412	0.14429	1	1	0.766913
regulation of cell differentiation	0.32233	0.00132797	0.061188	0.913922	1	0.745071
cell proliferation	0.629469	0.0272351	0.136379	0.995441	0.755547	0.526516
eye development	0.269721	0.259741	0.289025	0.409277	1	0.843187
tube morphogenesis	0.359655	0.00207944	0.0384793	0.67515	1	1
behavior	0.195252	0.365081	0.194779	0.680737	0.98842	0.652004
organ formation	0.460079	0.520267	0.0134097	0.64832	0.670566	0.766913
developmental process involved in reproduction	0.177456	0.523999	0.0166309	0.50336	1	0.862186
regulation of cellular metabolic process	0.0374611	0.440316	0.00656013	0.645907	1	0.95346
regulation of biosynthetic process	0.115249	0.244294	0.0171372	0.762869	1	0.96869
regulation of biological quality	0.261088	0.0490474	0.20066	0.645907	0.954643	1
positive regulation of cellular biosynthetic process	0.0341458	0.41192	0.00508363	0.761071	1	0.926187
bone morphogenesis	0.662965	0.212123	0.0260283	0.237974	1	1
urogenital system development	0.355355	0.0983655	0.28225	0.410255	1	1
activation of adenylate cyclase activity by serotonin receptor signaling pathway	0.509343	0.266724	0.490103	0.645907	0.670566	0.570195
cellular response to trichostatin A	0.509343	0.266724	0.490103	0.645907	0.670566	0.570195
ectoderm and mesoderm interaction	0.509343	0.266724	0.490103	0.645907	0.670566	0.570195
negative regulation of actin nucleation	0.509343	0.266724	0.490103	0.645907	0.670566	0.570195
negative regulation of calcineurin-NFAT signaling pathway	0.509343	0.266724	0.490103	0.645907	0.670566	0.570195
negative regulation of platelet-derived growth factor receptor-beta signaling pathway	0.509343	0.266724	0.490103	0.645907	0.670566	0.570195
negative regulation of the force of heart contraction involved in baroreceptor response to increased systemic arterial blood pressure	0.509343	0.266724	0.490103	0.645907	0.670566	0.570195
positive regulation of behavioral fear response	0.509343	0.266724	0.490103	0.645907	0.670566	0.570195
positive regulation of cardiac muscle cell differentiation	0.509343	0.266724	0.490103	0.645907	0.670566	0.570195
post-embryonic retina morphogenesis in camera-type eye	0.509343	0.266724	0.490103	0.645907	0.670566	0.570195
primary heart field specification	0.509343	0.266724	0.490103	0.645907	0.670566	0.570195
sinoatrial valve morphogenesis	0.509343	0.266724	0.490103	0.645907	0.670566	0.570195
regulation of organelle organization	0.509343	0.20024	0.490103	0.587002	0.670566	0.704095
sensory organ development	0.0161009	0.041412	0.632129	0.473582	1	1
positive regulation of locomotion	0.0467952	0.245891	0.233496	0.645907	1	1
muscle cell differentiation	0.255772	0.218038	0.0625149	0.645907	1	1
cardiac cell differentiation	0.178712	0.0967403	0.282991	0.627609	1	1
positive regulation of RNA metabolic process	0.0114102	0.518257	0.00876855	0.743992	1	0.914107
telencephalon development	0.370773	0.0103293	0.101495	0.753599	1	0.96869
blood circulation	0.355355	0.504401	0.114202	0.743992	0.728537	0.766913
regulation of immune system process	0.230637	0.120422	0.841497	1	0.670566	0.352163
insulin processing	0.662965	0.374333	0.644355	0.743992	0.670566	0.126663
regulation of cellular component movement	0.0065284	0.0998455	0.120223	1	1	1
positive regulation of macromolecule biosynthetic process	0.00822398	0.557514	0.0060984	0.743992	1	0.914107
second-messenger-mediated signaling	0.606373	0.25697	0.186455	0.67515	0.670566	0.843187
negative regulation of ossification	0.662965	0.167404	0.33198	0.645907	0.670566	0.766913
squamous basal epithelial stem cell differentiation involved in prostate gland acinus development	0.662965	0.374333	0.0915671	0.743992	0.670566	0.704095
regulation of locomotion	0.00224009	0.110559	0.136528	1	1	1
regulation of primary metabolic process	0.0376003	0.511767	0.00876855	0.691774	1	1
negative regulation of amyloid precursor protein biosynthetic process	0.115249	0.374333	0.644355	0.743992	0.670566	0.704095
growth	0.151503	0.877639	0.147834	0.087631	1	1
positive regulation of catalytic activity	0.271452	0.728072	0.194779	0.876399	0.93317	0.261802
determination of left/right symmetry	0.158352	0.0138686	0.644355	0.936729	0.670566	0.843187
positive regulation of mesenchymal cell proliferation	0.509343	0.0632213	0.00176519	0.715299	1	1
protein localization in membrane	0.148546	0.636154	0.0333122	0.473582	1	1
regulation of cAMP biosynthetic process	0.543493	0.046232	0.490103	0.680737	0.670566	0.862186
intracellular signal transduction	0.351587	0.539298	0.0993648	0.867831	0.670566	0.766913
positive regulation of biosynthetic process	0.032527	0.451589	0.00494232	0.840749	1	0.96869
negative regulation of macromolecule metabolic process	0.203975	0.013777	0.0838541	1	1	1
cardiac muscle tissue development	0.12367	0.849246	0.0369449	0.447612	0.844718	1
regulation of cell motility	0.00822398	0.133656	0.161384	1	1	1
negative regulation of cellular process	0.509343	0.0262961	0.00842078	1	1	0.766913
positive regulation of cellular metabolic process	0.0223774	0.542074	0.00494232	0.743992	1	1
response to hormone stimulus	0.685314	0.511767	0.610792	0.237974	0.670566	0.598339
prostate glandular acinus development	0.685314	0.266724	0.276593	0.087631	1	1
osteoblast differentiation	0.212552	0.0310529	0.0739276	1	1	1
regulation of multicellular organismal development	0.382105	0.00207944	0.194968	0.743992	1	1
G-protein signaling, coupled to cyclic nucleotide second messenger	0.718353	0.195864	0.216279	0.8203	0.670566	0.704095
positive regulation of mast cell activation	0.662965	0.25697	0.644355	0.653731	0.643326	0.473522
regulation of nucleobase-containing compound metabolic process	0.158352	0.352571	0.0315428	0.796064	1	0.997257
neural crest cell differentiation	0.280232	0.00512465	0.969466	0.087631	1	1
response to growth factor stimulus	0.509343	0.374333	0.0678035	0.743992	0.995528	0.653645
determination of bilateral symmetry	0.18435	0.0166639	0.664109	0.96707	0.670566	0.850404
regulation of biological process	0.31679	0.319197	0.0595399	0.659601	1	1
regulation of cAMP metabolic process	0.575957	0.050303	0.494263	0.707496	0.670566	0.875407
positive regulation of behavior	0.151503	0.625932	0.447886	1	0.670566	0.486183
regulation of nitrogen compound metabolic process	0.124022	0.364538	0.0421946	0.851383	1	1
negative regulation of macromolecule biosynthetic process	0.205392	0.0166639	0.164848	1	1	1
ossification	0.315002	0.0563936	0.0207437	1	1	1
toll-like receptor signaling pathway	0.178207	0.453083	0.841497	0.645907	0.670566	0.609464
negative regulation of apoptosis	0.620245	0.0971911	0.0384793	0.645907	1	1
respiratory system development	0.115249	0.421043	0.130551	0.743992	1	1
specification of symmetry	0.195252	0.0166639	0.691885	0.983898	0.670566	0.862186
regulation of adenylate cyclase activity	0.391258	0.193544	0.658777	0.743992	0.670566	0.766913
bone development	0.958421	0.364538	0.021532	0.237974	1	0.843187
glandular epithelial cell differentiation	0.132141	0.65349	0.490103	0.154376	1	0.997257
positive regulation of metabolic process	0.0144465	0.664644	0.00458193	0.743992	1	1
mesenchymal cell development	0.509343	0.0896207	0.448059	0.380648	1	1
negative regulation of programmed cell death	0.659983	0.103747	0.0189666	0.645907	1	1
regulation of cell morphogenesis	0.11403	0.0816433	0.490103	0.743992	1	1
positive regulation of cell motility	0.0630318	0.366265	0.289025	0.72069	1	1
regulation of phosphate metabolic process	0.351587	0.727158	0.233496	0.50336	1	0.624101
negative regulation of cellular biosynthetic process	0.280232	0.00765485	0.169176	1	1	1
myeloid leukocyte differentiation	0.757313	0.00207944	0.271417	1	0.670566	0.756174
lymphocyte proliferation	0.543493	0.04412	1	0.95818	0.670566	0.242527
negative regulation of cellular macromolecule biosynthetic process	0.311009	0.0125779	0.147834	1	1	1
aging	0.645297	0.554064	0.289025	0.414708	0.670566	0.900186
regulation of cell migration	0.00822398	0.310156	0.169176	1	1	1
epidermis morphogenesis	0.328697	0.636154	0.28225	1	0.768962	0.473522
positive regulation of developmental growth	0.094708	0.329638	0.644355	0.597531	0.857784	0.96869
extracellular matrix organization	0.389944	0.730584	0.188796	0.189736	1	1
leukocyte proliferation	0.64256	0.0566395	0.841497	1	0.670566	0.288973
stem cell differentiation	0.0838602	0.153222	0.490103	0.936729	1	0.843187
positive regulation of bone mineralization	0.739597	0.520267	0.161963	0.64832	0.670566	0.766913
negative regulation of cellular metabolic process	0.355355	0.0166639	0.136379	1	1	1
regulation of ossification	0.842357	0.0998455	0.0817068	0.645907	1	0.843187
regulation of mesenchymal cell proliferation	0.64256	0.0918561	0.00101301	0.780038	1	1
negative regulation of metabolic process	0.322611	0.0103293	0.191718	1	1	1
negative regulation of cell death	0.69317	0.125217	0.0268375	0.680737	1	1
embryonic digestive tract development	0.132141	0.266724	0.265251	1	1	0.875407
pattern recognition receptor signaling pathway	0.254029	0.511767	0.745882	0.653731	0.670566	0.704095
negative regulation of biosynthetic process	0.325264	0.0100079	0.206286	1	1	1
positive regulation of ossification	0.96212	0.296986	0.14429	0.80605	0.850262	0.493279
regulation of cyclic nucleotide biosynthetic process	0.662965	0.063223	0.467246	0.743992	0.670566	0.945664
negative regulation of RNA metabolic process	0.287257	0.0166639	0.251634	1	1	1
cellular response to growth factor stimulus	0.372116	0.735733	0.113466	0.645907	0.874093	0.814643
positive regulation of cell migration	0.0564679	0.532892	0.269948	0.698199	1	1
regulation of cyclic nucleotide metabolic process	0.685314	0.0745029	0.334262	0.790713	0.710464	0.96869
skeletal muscle organ development	0.166498	1	0.120983	0.790713	0.995528	0.493279
mononuclear cell proliferation	0.591959	0.050303	1	0.995441	0.670566	0.261802
positive regulation of cellular component movement	0.0821537	0.379765	0.364405	0.743992	1	1
regulation of cyclase activity	0.439051	0.205693	0.717801	0.774523	0.670566	0.766913
regulation of lymphocyte activation	0.472819	0.115511	0.490103	1	0.971757	0.526516
regulation of cell development	0.235145	0.00451612	0.614758	0.728335	1	1
regulation of chondrocyte differentiation	0.509343	0.581614	0.232864	0.418294	1	0.843187
age-dependent response to oxidative stress	0.757313	0.453083	0.0119972	0.851383	0.752602	0.766913
cognition	0.135814	0.374333	0.0915671	1	1	1
innate immune response-activating signal transduction	0.272823	0.518257	0.764887	0.67515	0.670566	0.704095
learning or memory	0.136574	0.304647	0.169176	1	1	1
negative regulation of transcription, DNA-dependent	0.355355	0.013155	0.251634	1	1	1
negative regulation of transcription from RNA polymerase II promoter	0.355355	0.00237626	0.266541	1	1	1
dorsal/ventral pattern formation	0.0630318	0.385707	0.1772	1	1	1
positive regulation of innate immune response	0.269721	0.338936	1	0.645907	0.670566	0.701935
regulation of metabolic process	0.115249	0.641656	0.0209043	0.851383	1	1
hormone-mediated signaling pathway	0.668531	0.641656	1	0.456183	0.670566	0.194065
hindlimb morphogenesis	0.195252	0.101235	0.368919	1	1	0.96869
negative regulation of gene expression	0.272823	0.010934	0.362515	1	1	1
cAMP metabolic process	0.0978046	0.557514	0.764887	0.680737	0.726248	0.834335
negative regulation of nucleobase-containing compound metabolic process	0.422972	0.018133	0.224624	1	1	1
morphogenesis of embryonic epithelium	0.318044	0.0179973	0.628647	0.715299	1	1
genitalia development	0.311009	0.611753	0.0289113	0.743992	1	1
morphogenesis of a branching epithelium	0.842204	0.06798	0.0472918	0.743992	1	1
negative regulation of nitrogen compound metabolic process	0.449905	0.0117711	0.251634	1	1	1
regulation of lyase activity	0.472304	0.213754	0.764887	0.815131	0.670566	0.780081
epithelial tube morphogenesis	0.662965	0.00765485	0.307791	0.743992	1	1
renal system development	0.185486	0.202144	0.493962	0.846554	1	0.997257
cardiac muscle cell differentiation	0.151503	0.818047	0.117789	0.645907	0.995528	1
regulation of cellular macromolecule biosynthetic process	0.242573	0.511767	0.0280355	0.947887	1	1
camera-type eye development	0.362218	0.266724	0.447886	0.653731	1	1
embryonic organ development	0.0390475	0.143277	0.658777	0.891982	1	1
regulation of transcription, DNA-dependent	0.203844	0.460632	0.0702159	1	1	1
regulation of skeletal muscle tissue development	0.151503	0.155832	0.490103	0.93769	1	1
negative regulation of multicellular organismal process	0.662965	0.0356596	0.0385633	1	1	1
positive regulation of lymphocyte activation	0.492023	0.266724	0.505017	1	1	0.473522
embryonic organ morphogenesis	0.0594325	0.0967403	0.686788	0.901312	1	1
gland development	0.739597	0.0272351	0.127569	0.851383	1	1
positive regulation of cell projection organization	0.422972	0.200619	0.361552	1	0.995528	0.766913
peptide hormone processing	0.662965	0.486077	0.644355	0.995441	0.670566	0.288973
positive regulation of biomineral tissue development	0.757941	0.557514	0.191718	0.680737	0.726248	0.834335
norepinephrine-epinephrine vasoconstriction involved in regulation of systemic arterial blood pressure	0.757313	0.453083	0.169176	0.851383	0.752602	0.766913
negative regulation of blood pressure	0.839385	0.581614	0.0219663	0.715299	0.752602	0.843187
skeletal muscle tissue development	0.509343	0.99057	0.0802375	0.743992	0.956478	0.473522
regulation of gene expression	0.351587	0.533385	0.067475	0.815014	1	1
regulation of macromolecule biosynthetic process	0.182844	0.559696	0.0333122	0.995441	1	1
regulation of cytoskeleton organization	0.64256	0.205693	0.549068	0.936729	0.670566	0.766913
positive regulation of macromolecule metabolic process	0.00822398	1	0.0218997	0.743992	1	1
prostate gland development	0.439051	0.699548	0.397072	0.242866	1	1
regulation of RNA metabolic process	0.269721	0.494968	0.0802375	0.936729	1	1
prostatic bud formation	0.195252	0.453083	0.764887	0.851383	0.752602	0.766913
mesoderm development	0.569354	0.120422	0.0957668	1	1	1
neural crest cell development	0.381135	0.195864	1	0.21094	1	1
chondrocyte differentiation	0.662965	0.698088	0.368919	0.242866	0.850262	0.96869
biological regulation	0.345655	0.377922	0.116029	0.95818	1	1
morphogenesis of a branching structure	0.685314	0.120422	0.0690263	0.936729	1	1
epithelial-mesenchymal cell signaling	0.509343	0.152816	1	0.154376	1	0.997257
osteoclast differentiation	0.842357	0.0141104	0.841497	0.846554	0.670566	0.609464
regulation of transport	0.739597	0.196212	0.123618	1	1	0.766913
prostate gland epithelium morphogenesis	0.395711	0.507057	0.644355	0.282511	1	1
regulation of growth	0.272823	0.511767	0.0558135	1	1	1
sex differentiation	0.31621	0.536507	0.00229005	0.98723	1	1
response to organic substance	0.805699	0.256335	0.307791	0.70749	1	0.766913
negative regulation of Wnt receptor signaling pathway	0.509343	0.453083	0.252383	0.645907	1	1
regulation of striated muscle tissue development	0.355355	0.0170894	0.490103	1	1	1
embryonic hindlimb morphogenesis	0.0836303	0.215286	0.762112	1	1	0.804161
regulation of sequence-specific DNA binding transcription factor activity	0.115249	0.266724	0.490103	1	1	1
BMP signaling pathway	0.662965	0.205693	0.614758	0.698199	1	0.69106
regulation of chromosome organization	0.757313	0.181852	1	0.708853	0.681885	0.54484
positive regulation of axon extension	0.662965	0.153222	1	0.645907	0.670566	0.745071
regulation of macromolecule metabolic process	0.136574	0.955854	0.042507	0.743992	1	1
central nervous system neuron differentiation	0.662965	0.153222	0.0680003	1	1	1
regulation of muscle organ development	0.381135	0.018591	0.496561	1	1	1
mesoderm morphogenesis	0.662965	0.212123	0.0260283	1	1	1
regulation of osteoblast differentiation	0.685314	0.153222	0.127569	0.936729	1	1
response to stimulus	0.413564	0.04412	0.450878	0.995441	1	1
skeletal system morphogenesis	0.757313	0.374333	0.147834	0.653731	1	1
nuclear migration	0.132141	0.65349	1	0.154376	1	0.997257
regulation of anatomical structure size	0.662965	0.270974	0.335985	1	0.670566	0.997257
regulation of cartilage development	0.757313	0.775121	0.0915671	0.315667	1	1
limbic system development	0.539513	0.266724	0.14429	1	1	1
odontogenesis of dentine-containing tooth	0.359655	0.050303	0.549068	0.995441	1	1
vasculature development	0.757313	0.504401	0.0189666	0.67515	1	1
cell motility	0.757313	0.0252518	0.322504	0.851383	1	1
regulation of system process	0.195252	0.837379	0.366168	1	1	0.570195
positive regulation of cell development	0.151503	0.0103293	0.810772	1	1	1
blood vessel development	0.662965	0.581614	0.0251325	0.715299	1	1
reproductive structure development	0.502932	0.722228	0.0187286	0.743992	1	1
subpallium development	0.151503	0.0686844	0.775826	1	1	1
cellular component organization at cellular level	0.286012	0.885608	0.644355	0.183574	1	1
regulation of Wnt receptor signaling pathway	0.317747	0.921501	0.251634	0.523098	1	1
regulation of leukocyte proliferation	0.195252	0.27695	0.933208	1	1	0.609464
regulation of skeletal muscle fiber development	0.52061	0.265346	0.490103	0.743992	1	1
response to chemical stimulus	0.796202	0.0612014	0.644355	1	0.995528	0.525331
canonical Wnt receptor signaling pathway	0.355355	0.181852	0.490103	1	1	1
anterior/posterior pattern specification	0.657825	0.153222	0.572039	0.645907	1	1
columnar/cuboidal epithelial cell differentiation	0.0697634	1	0.490103	0.473582	1	1
regulation of lymphocyte proliferation	0.177981	0.266724	1	1	1	0.598339
regulation of mononuclear cell proliferation	0.18418	0.266724	1	1	1	0.601583
mesoderm formation	0.842357	0.195864	0.0203905	1	1	1
T cell proliferation	0.438426	0.198578	1	1	0.670566	0.766913
cellular component organization or biogenesis at cellular level	0.354836	0.837379	0.644355	0.237974	1	1
lymphocyte homeostasis	0.362218	0.0194229	0.925292	1	0.844703	0.926456
odontogenesis	0.592853	0.205693	0.540204	0.743992	1	1
respiratory tube development	0.391258	0.85275	0.194779	0.645907	1	1
embryonic heart tube development	0.359655	0.186927	0.549068	0.995441	1	1
homeostasis of number of cells	0.345655	0.0998455	1	0.645907	1	1
learning	0.707264	0.364538	0.021532	1	1	1
ameboidal cell migration	0.516384	0.0967403	0.490103	1	1	1
positive regulation of pseudopodium assembly	0.195252	0.739418	0.169176	1	1	1
positive regulation of T cell activation	0.718841	0.266724	0.368919	1	1	0.766913
response to drug	0.662965	0.436368	0.257113	1	1	0.766913
negative regulation of chondrocyte differentiation	0.31679	0.849246	0.276593	0.680737	1	1
inner ear development	0.151942	0.453083	0.841497	0.680737	1	1
regulation of apoptosis	0.509343	0.65349	0.158602	0.808845	1	1
regulation of programmed cell death	0.516384	0.659468	0.105144	0.851383	1	1
cell migration	0.739597	0.0230482	0.375295	1	1	1
development of primary sexual characteristics	0.509343	0.631735	0.00229005	0.995441	1	1
lung alveolus development	0.918959	0.65349	0.0424968	0.535419	1	1
striated muscle cell differentiation	0.18418	1	0.031501	0.936729	1	1
branching morphogenesis of a tube	0.757313	0.266724	0.129701	1	1	1
gastrulation	1	0.153222	0.00508363	1	1	1
heart looping	0.416913	0.101235	0.644355	1	1	1
lung development	0.509343	0.837379	0.173759	0.645907	1	1
regulation of muscle cell differentiation	0.439051	0.212123	0.775826	0.743992	1	1
mammary gland epithelium development	0.46098	0.06798	0.644355	1	1	1
mammary gland development	0.591959	0.205693	0.377383	1	1	1
cell adhesion	0.132141	0.348473	0.698195	1	1	1
positive regulation of skeletal muscle tissue development	0.280232	0.25697	0.644355	1	1	1
artery development	0.234848	0.557514	1	0.389423	1	1
neural tube development	0.351587	0.00207944	0.841497	1	1	1
positive regulation of defense response	0.454527	0.121289	1	0.981636	0.670566	0.96869
epithelial to mesenchymal transition	0.739597	0.364538	0.20762	0.885418	1	1
regulation of cell death	0.543493	0.739418	0.117789	0.805253	1	1
embryonic digit morphogenesis	0.184207	0.672547	0.350288	1	1	1
smooth muscle cell differentiation	1	0.0227941	0.251634	0.936729	1	1
regulation of cell shape	0.439051	0.739418	0.0421946	1	1	1
epithelial cell differentiation	0.606574	0.20024	0.414134	1	1	1
leukocyte homeostasis	0.416913	0.0227941	0.96545	1	0.850262	0.96869
regulation of pseudopodium assembly	0.238995	0.782456	0.203579	1	1	1
nucleobase-containing small molecule metabolic process	0.238995	0.416947	0.841384	1	0.728537	1
regulation of T cell activation	0.532447	0.286469	0.644355	1	1	0.766913
cardiac conduction	0.842357	0.511767	0.251634	0.936729	0.850262	0.843187
positive regulation of melanocyte differentiation	0.842357	0.511767	0.251634	0.936729	0.850262	0.843187
urinary bladder development	0.842357	0.511767	0.251634	0.936729	0.850262	0.843187
branch elongation of an epithelium	0.685314	1	0.276593	0.276345	1	1
regulation of canonical Wnt receptor signaling pathway	0.351587	0.99057	0.1618	0.743992	1	1
positive regulation of epithelial cell proliferation	0.668531	0.569093	0.0166309	0.995441	1	1
regulation of nervous system development	0.516384	0.0166639	0.779449	0.93769	1	1
positive regulation of striated muscle tissue development	0.151503	0.329638	0.775826	1	1	1
establishment of nucleus localization	0.238995	0.782456	1	0.237974	1	1
positive regulation of neuron differentiation	0.509343	0.260752	0.490103	1	1	1
immune system process	0.757313	0.155832	0.490103	1	1	0.857087
positive regulation of phosphorylation	0.662965	0.797922	0.158602	0.645907	1	1
neuron recognition	0.254029	0.242345	0.775826	1	1	1
regulation of histone modification	0.543493	0.167109	1	0.95818	0.995528	0.609464
positive regulation of neurogenesis	0.380382	0.0227941	0.875441	1	1	1
neural tube patterning	0.234848	0.0531478	1	1	1	1
nucleotide metabolic process	0.254029	0.41192	0.773974	1	0.850262	1
digestive tract morphogenesis	0.815802	0.393651	0.127569	0.95818	1	1
regulation of binding	0.734044	0.199152	0.366168	1	1	1
positive regulation of lymphocyte proliferation	0.195252	0.467434	1	1	1	0.642244
blood vessel morphogenesis	0.757313	0.557514	0.251384	0.743992	1	1
formation of primary germ layer	1	0.286469	0.0295366	1	1	1
regulation of heart morphogenesis	0.64256	0.028691	1	0.645907	1	1
epidermal cell differentiation	0.509343	0.245127	0.841497	1	0.752602	0.96869
regulation of cellular component biogenesis	1	0.196212	0.133553	1	1	1
spinal cord development	0.898005	0.329638	0.105144	1	1	1
regulation of behavior	0.0814159	1	0.490103	1	0.995528	0.766913
positive regulation of mononuclear cell proliferation	0.203439	0.481005	1	1	1	0.652004
ear development	0.119575	0.565857	1	0.653731	1	1
lateral sprouting from an epithelium	0.509343	0.698749	0.136379	1	1	1
fat cell differentiation	0.280232	0.625932	0.447886	1	1	1
cell fate commitment	1	0.0736715	0.632129	0.64832	1	1
positive regulation of leukocyte proliferation	0.212354	0.489101	1	1	1	0.655924
leukocyte differentiation	1	0.0278208	0.33198	1	1	1
hindgut morphogenesis	0.195252	1	0.169176	1	1	1
gland morphogenesis	1	0.286469	0.403207	0.680737	1	1
cell fate determination	1	0.00190188	0.644355	0.851383	0.88566	0.988494
embryo development ending in birth or egg hatching	0.306111	0.0686844	1	1	1	1
positive regulation of myoblast differentiation	1	0.205693	0.169176	1	1	1
regulation of epithelial to mesenchymal transition	0.559223	0.0720633	1	0.743992	1	1
cellular response to lipid	1	0.129606	0.251634	1	1	1
hemopoietic stem cell differentiation	0.842357	0.0686844	0.841497	0.936729	0.850262	0.843187
polarized epithelial cell differentiation	0.842357	0.0686844	0.841497	0.936729	0.850262	0.843187
positive regulation of binding	0.354256	0.266724	0.764887	1	1	1
striatum development	0.115249	0.270974	1	1	1	1
neuron migration	1	0.20024	1	0.550033	0.726248	0.914107
positive regulation of phosphate metabolic process	0.739597	0.849246	0.127569	0.680737	1	1
regulation of neuron differentiation	0.509343	0.123213	0.764887	1	1	1
cellular response to oxygen levels	1	0.114473	0.410474	1	0.88566	0.988494
adrenergic receptor signaling pathway	1	0.205693	0.549068	0.645907	1	1
tube formation	0.718841	0.0332655	0.652701	1	1	1
multicellular organismal homeostasis	0.662965	0.0521331	1	0.68994	1	1
positive regulation of immunoglobulin mediated immune response	0.354836	0.0531478	1	1	1	1
regulation of phospholipase activity	0.860267	0.451935	0.0990042	1	1	1
inner ear morphogenesis	0.170087	0.453083	1	0.790713	1	1
embryonic cleavage	0.0689499	0.557514	0.925292	0.995441	0.956478	0.914107
regulation of cell morphogenesis involved in differentiation	0.382105	0.109914	1	0.926558	1	1
regulation of neurogenesis	0.499142	0.0809025	0.841497	1	1	1
tail morphogenesis	1	0.0612014	0.362515	1	1	1
epithelial cell proliferation	0.79123	0.38212	0.268235	1	1	1
regulation of epithelial cell differentiation	0.272823	0.955854	0.222925	1	1	1
cartilage development involved in endochondral bone morphogenesis	0.739597	0.885608	0.719885	0.106518	1	1
trachea development	0.391258	0.0612014	1	1	1	1
response to mechanical stimulus	0.122123	0.693736	0.786056	0.851383	1	1
neuron fate commitment	0.874613	0.0566395	0.841497	0.680737	1	1
regulation of mast cell activation	1	0.144752	1	0.93769	0.670566	0.704095
stem cell development	0.272823	0.240729	0.944019	1	1	1
hindbrain morphogenesis	1	0.04412	0.413532	1	1	1
regulation of systemic arterial blood pressure by norepinephrine-epinephrine	1	0.698749	0.136379	0.627609	1	1
muscle organ development	0.224878	1	0.251634	0.995441	1	1
regulation of epithelial cell proliferation	0.841182	0.50508	0.129701	1	1	1
pigmentation	0.758121	0.20024	0.519559	1	1	1
somite development	1	0.0227941	0.705007	0.753599	1	1
epithelial tube formation	0.842357	0.0246321	0.614758	1	1	1
positive regulation of axonogenesis	0.79123	0.155832	1	0.93769	0.995528	0.601583
myelin assembly	0.195252	0.739418	0.549068	1	1	1
ventral spinal cord interneuron differentiation	0.195252	0.739418	0.549068	1	1	1
associative learning	0.815802	0.393651	0.28225	1	1	1
embryonic digestive tract morphogenesis	0.918959	0.390132	0.203579	1	1	1
regulation of actin cytoskeleton organization	1	0.212123	0.549068	1	0.752602	1
regulation of cell projection assembly	0.662965	0.698088	0.15847	1	1	1
chordate embryonic development	0.472567	0.063223	0.990782	1	1	1
somatic stem cell maintenance	0.272823	0.256335	1	1	1	1
lateral mesoderm development	1	0.120635	0.410474	1	1	1
positive regulation of transport	0.492023	0.767207	0.276276	1	1	1
keratinocyte proliferation	0.739597	0.270974	1	1	1	0.526904
regulation of neuronal synaptic plasticity	0.509343	1	0.0981345	0.936729	1	1
regulation of cell growth	0.782529	0.511767	0.251634	1	1	1
stem cell maintenance	0.439051	0.212123	0.89935	1	1	1
axis elongation	0.898005	1	0.178995	0.473582	1	1
response to nutrient levels	0.953128	0.390132	0.212991	1	1	1
positive regulation of protein phosphorylation	0.662965	1	0.222925	0.680737	1	1
protein K48-linked ubiquitination	0.559223	1	0.265251	0.743992	1	1
gonad development	0.739597	0.807559	0.024588	1	1	1
regulation of DNA binding	0.757313	0.092125	0.722547	1	1	1
outflow tract morphogenesis	1	0.557514	0.0203905	1	1	1
regulation of fat cell differentiation	0.904179	0.0610537	0.614758	1	1	1
genitalia morphogenesis	0.31679	0.266724	1	1	1	1
regulation of actin filament-based process	1	0.232591	0.60287	1	0.752602	1
positive regulation of immune effector process	0.333898	0.25697	1	1	1	0.997257
kidney development	0.250764	0.528633	0.810772	1	1	1
glial cell development	0.0439068	0.556889	1	1	1	1
nucleus localization	0.481152	0.99057	1	0.154376	1	1
negative regulation of cell communication	1	0.46111	0.166385	1	1	1
dorsal/ventral axis specification	1	0.441279	0.251634	0.936729	1	1
detection of mechanical stimulus involved in sensory perception	0.685314	0.266724	1	0.680737	1	1
cAMP catabolic process	0.238995	0.782456	0.614758	1	1	1
neuron fate determination	1	0.152816	0.490103	1	1	0.997257
smoothened signaling pathway involved in regulation of cerebellar granule cell precursor cell proliferation	0.195252	0.453083	1	1	1	1
glomerulus morphogenesis	1	0.611753	0.0739276	1	0.995528	0.96869
regulation of protein complex assembly	1	0.611753	0.288933	1	0.752602	1
ventral spinal cord interneuron fate commitment	0.167964	1	0.490103	1	1	1
negative regulation of cell migration	0.195252	0.818761	0.644355	1	1	1
negative regulation of interleukin-17 production	0.509343	0.152816	1	1	1	0.997257
ear morphogenesis	0.177456	0.545623	1	0.936729	1	1
hippocampus development	0.757313	0.144752	0.761054	1	1	1
neural tube formation	0.842357	0.0103293	0.810772	1	1	1
embryonic eye morphogenesis	0.739597	0.205693	0.719885	1	1	1
regulation of cellular localization	0.757313	0.25697	0.651447	1	1	1
embryonic epithelial tube formation	0.842204	0.0236506	0.799978	1	1	1
vasculogenesis	0.706464	0.246865	0.969466	0.743992	1	1
negative regulation of cell differentiation	0.585145	0.266724	0.847749	1	1	0.96869
establishment or maintenance of cell polarity	0.122123	1	1	0.550033	1	1
semicircular canal development	1	0.184038	0.490103	1	1	1
development of primary male sexual characteristics	0.662965	1	0.0145104	1	1	1
protein heterotetramerization	0.132141	1	1	0.549918	1	1
regulation of myeloid leukocyte mediated immunity	0.272823	0.416947	1	1	1	1
calcium ion transport	1	0.658289	1	0.93769	0.835722	0.261802
regulation of long-term neuronal synaptic plasticity	0.685314	1	0.00876855	1	1	1
negative regulation of locomotion	0.213182	0.999541	0.490103	1	1	1
epidermis development	0.195252	0.514432	1	1	1	1
positive regulation of cAMP biosynthetic process	1	0.242345	0.775826	0.691774	1	1
regulation of chemotaxis	0.142014	1	0.569448	1	1	1
negative regulation of insulin secretion	0.739597	0.205693	1	1	1	0.766913
embryonic forelimb morphogenesis	0.195252	0.520267	1	1	1	1
renal absorption	0.107971	0.611753	1	1	1	1
cyclic nucleotide catabolic process	0.115249	0.885608	0.719885	1	1	1
negative regulation of cell motility	0.212354	0.846904	0.664109	1	1	1
negative regulation of cellular component movement	0.272823	0.90387	0.549068	1	1	1
trachea cartilage morphogenesis	0.280232	0.511767	1	0.936729	1	1
response to extracellular stimulus	1	0.480434	0.251634	1	1	1
female sex differentiation	0.662965	1	0.0713751	1	1	1
purine-containing compound metabolic process	0.261088	0.486535	1	1	1	1
male sex differentiation	0.739597	1	0.00876855	1	1	1
regulation of leukocyte mediated immunity	0.509343	0.253574	1	1	1	0.98799
oligodendrocyte development	0.509343	0.242345	1	1	1	1
pallium development	0.662965	0.0896207	1	1	1	1
positive regulation of blood pressure by epinephrine-norepinephrine	1	0.65349	0.105159	1	1	0.997257
regulation of organ morphogenesis	1	0.592264	0.169176	0.995441	1	1
somitogenesis	1	0.195864	0.567466	0.995441	1	1
development of primary female sexual characteristics	0.638835	1	0.120223	1	1	1
ventral spinal cord development	0.719051	1	0.0416754	1	1	1
positive regulation of hydrolase activity	0.509343	1	0.251634	1	1	1
tissue remodeling	1	0.15831	0.925292	0.680737	1	1
negative regulation of signaling	1	0.611753	0.166385	1	1	1
cell differentiation in spinal cord	0.96212	0.672547	0.14429	1	1	1
positive regulation of cAMP metabolic process	1	0.256335	0.810772	0.715299	1	1
palate development	0.739597	1	0.0453311	1	1	1
nonmotile primary cilium assembly	0.132141	0.65349	1	1	1	1
ventral midline development	0.280232	0.511767	1	1	1	1
regulation of protein catabolic process	0.509343	1	0.283347	1	1	1
response to peptide hormone stimulus	0.793559	0.854445	1	0.242866	0.907706	1
regulation of lipase activity	1	0.557514	0.246196	1	1	1
positive regulation of phospholipase C activity	0.968562	0.631736	0.208285	1	1	1
cerebellum morphogenesis	1	0.167404	0.644355	1	1	1
positive regulation of phospholipase activity	1	0.66867	0.145098	1	1	1
cellular response to abiotic stimulus	0.224878	0.592264	1	1	1	1
negative regulation of peptide hormone secretion	0.757941	0.231105	1	1	1	0.834335
positive regulation of angiogenesis	1	0.276037	0.549068	1	1	1
midgut development	1	0.0612014	0.764887	1	1	1
embryonic camera-type eye development	1	0.0580578	0.775826	1	1	1
negative regulation of smooth muscle cell migration	1	0.698749	0.136379	1	1	1
positive regulation of endothelial cell differentiation	1	0.698749	0.136379	1	1	1
negative regulation of canonical Wnt receptor signaling pathway	0.757313	1	0.282991	0.797889	1	1
cellular response to hypoxia	1	0.266724	0.572039	1	1	1
forebrain radial glial cell differentiation	1	0.00380424	0.841497	1	1	1
cardiac neural crest cell differentiation involved in heart development	0.842357	0.0686844	1	0.936729	1	1
regulation of telomerase activity	1	0.234286	0.614758	1	1	1
primary prostatic bud elongation	0.115249	1	1	0.743992	1	1
purine base catabolic process	0.115249	1	1	0.743992	1	1
positive regulation of myeloid cell differentiation	1	0.218785	0.644355	1	1	1
negative regulation of neuron apoptosis	1	0.698749	0.164651	1	1	1
trachea morphogenesis	0.167964	0.698749	1	1	1	1
negative regulation of response to stimulus	1	0.668213	0.208053	1	1	1
diencephalon development	1	0.107084	0.769926	1	1	1
regulation of histone acetylation	1	0.153222	1	0.981636	1	0.745071
negative regulation of peptide secretion	0.794706	0.242345	1	1	1	0.843187
in utero embryonic development	0.662965	0.218703	1	1	1	1
positive regulation of intracellular protein kinase cascade	0.238995	1	1	0.645907	1	1
cellular response to molecule of bacterial origin	0.832456	0.276037	0.786056	1	1	1
forebrain generation of neurons	1	0.0686401	0.841497	1	1	1
central nervous system myelination	1	0.25697	1	0.653731	1	1
positive regulation of cyclic nucleotide biosynthetic process	1	0.266724	0.89935	0.751212	1	1
regulation of phosphatidylinositol 3-kinase activity	1	1	0.276593	0.93769	1	0.704095
melanosome transport	0.662965	0.25697	1	1	1	1
mammary gland epithelial cell proliferation	1	0.266724	0.658777	1	1	1
regulation of peptidyl-lysine acetylation	1	0.167404	1	0.995441	1	0.766913
protein localization to nucleus	0.280232	0.65349	1	1	1	1
positive regulation of lipase activity	1	0.739418	0.194968	1	1	1
positive regulation of DNA binding	0.739597	0.205693	1	1	1	1
establishment of melanosome localization	0.685314	0.266724	1	1	1	1
pigment granule transport	0.685314	0.266724	1	1	1	1
positive regulation of chemotaxis	0.188206	1	0.764887	1	1	1
negative regulation of developmental process	0.842204	0.264477	0.852987	1	1	1
positive regulation of interleukin-8 secretion	0.195252	1	0.764887	1	1	1
peptidyl-tyrosine phosphorylation	1	1	0.222925	0.743992	1	1
midbrain development	1	0.215286	0.762112	1	1	1
spinal cord motor neuron differentiation	1	1	0.067475	0.913922	1	1
neuroblast proliferation	0.96212	0.0204583	1	1	1	1
negative regulation of protein phosphorylation	1	0.240729	1	0.743992	1	1
organelle fusion	0.845962	0.266724	1	1	1	0.875407
negative regulation of fat cell differentiation	0.757941	0.231105	1	1	1	1
cellular response to lipopolysaccharide	1	0.266724	0.722547	1	1	1
male gonad development	0.918959	1	0.0713751	1	1	1
regulation of endothelial cell proliferation	1	1	0.199707	1	1	0.79206
negative regulation of adenylate cyclase activity	0.736193	0.256335	1	1	1	1
rhythmic process	0.845962	1	0.147834	1	1	1
chondrocyte differentiation involved in endochondral bone morphogenesis	0.757313	1	1	0.237974	1	1
peptidyl-tyrosine modification	1	1	0.251634	0.743992	1	1
negative regulation of lyase activity	0.739597	0.260752	1	1	1	1
endoderm development	1	1	0.0431766	0.95818	1	1
radial glial cell differentiation	1	0.011242	0.990782	1	1	1
cellular response to calcium ion	0.842357	1	0.161998	1	1	1
regulation of Wnt receptor signaling pathway involved in dorsal/ventral axis specification	1	0.0686844	1	0.936729	1	1
cellular response to cAMP	1	1	0.00762601	1	1	1
establishment of pigment granule localization	0.739597	0.270974	1	1	1	1
rostrocaudal neural tube patterning	0.739597	0.270974	1	1	1	1
neural tube closure	1	0.0147453	1	1	1	1
tube closure	1	0.0161946	1	1	1	1
primary neural tube formation	1	0.0166639	1	1	1	1
regulation of non-canonical Wnt receptor signaling pathway	1	0.0967403	0.925292	1	1	1
cellular response to prostaglandin E stimulus	1	0.0226536	1	1	1	1
formation of radial glial scaffolds	1	0.0226536	1	1	1	1
regulation of secretion	0.757313	0.266724	1	1	1	1
positive regulation of bone resorption	1	0.028691	1	1	1	1
hindbrain development	1	0.107084	0.925292	1	1	1
autonomic nervous system development	1	0.0324492	1	1	1	1
regulation of bone remodeling	1	0.0356596	1	1	1	1
memory	0.0365834	1	1	1	1	1
negative regulation of interferon-gamma production	1	0.0444619	1	1	1	1
positive regulation of phagocytosis	0.0454962	1	1	1	1	1
endocardial cushion formation	1	1	0.0472918	1	1	1
positive regulation of endothelial cell proliferation	1	0.885608	0.165024	1	1	1
leukocyte migration	1	0.286469	0.764887	1	1	1
bone remodeling	1	0.0531478	1	1	1	1
positive regulation of respiratory burst	0.280232	1	0.841497	0.936729	1	1
prostate gland morphogenetic growth	0.280232	1	0.841497	0.936729	1	1
positive regulation of toll-like receptor signaling pathway	0.0630318	1	1	1	1	1
response to magnesium ion	1	1	0.0677217	1	1	1
cellular response to prostaglandin stimulus	1	0.0686844	1	1	1	1
hindbrain radial glia guided cell migration	1	0.0686844	1	1	1	1
positive regulation of toll-like receptor 4 signaling pathway	0.0689499	1	1	1	1	1
regulation of endothelial cell differentiation	1	0.818047	0.251634	1	1	1
specification of organ identity	1	0.818047	0.251634	1	1	1
regulation of epithelial cell proliferation involved in lung morphogenesis	1	1	0.0739276	1	1	1
negative regulation of leukocyte activation	0.964755	0.110878	1	1	1	1
regulation of angiogenesis	1	0.253574	0.824518	1	1	1
superoxide metabolic process	1	1	0.0804985	1	1	1
cell chemotaxis	1	0.0813656	1	1	1	1
negative regulation of DNA repair	1	1	0.0915671	1	1	1
negative regulation of smooth muscle cell proliferation	1	1	0.0915671	1	1	1
response to cAMP	1	1	0.0915671	1	1	1
mesenchymal cell proliferation involved in lung development	0.842357	1	0.251634	1	1	1
response to cytokine stimulus	1	0.145225	0.949511	1	1	1
regulation of immunoglobulin mediated immune response	0.839385	0.256335	1	1	1	1
regulation of regulatory T cell differentiation	1	0.0967403	1	1	1	1
regulation of timing of neuron differentiation	1	0.0967403	1	1	1	1
smoothened signaling pathway	1	0.107084	0.990782	1	1	1
cellular nitrogen compound biosynthetic process	1	0.256335	1	1	1	0.843187
long-term memory	0.10007	1	1	1	1	1
regulation of tissue remodeling	1	0.101235	1	1	1	1
nucleoside monophosphate catabolic process	0.213182	1	0.88818	1	1	1
cellular response to mechanical stimulus	0.102054	1	1	1	1	1
regulation of myeloid leukocyte differentiation	1	0.107084	1	1	1	1
regulation of B cell mediated immunity	0.842357	0.265346	1	1	1	1
mammary gland duct morphogenesis	1	0.266724	0.841497	1	1	1
regulation of phagocytosis	0.108542	1	1	1	1	1
positive regulation of interleukin-6 secretion	0.115249	1	1	1	1	1
positive regulation of Schwann cell differentiation	0.115249	1	1	1	1	1
positive regulation of toll-like receptor 2 signaling pathway	0.115249	1	1	1	1	1
renal sodium ion transport	0.115249	1	1	1	1	1
serine family amino acid catabolic process	0.115249	1	1	1	1	1
cellular response to cytokine stimulus	1	0.118189	1	1	1	1
response to X-ray	1	0.129606	0.990782	1	1	1
positive regulation of tissue remodeling	1	0.120422	1	1	1	1
neural crest formation	1	0.120635	1	1	1	1
GTP metabolic process	0.280232	0.850341	0.990782	1	1	1
regulation of toll-like receptor 2 signaling pathway	0.280232	1	0.841497	1	1	1
regulation of toll-like receptor 3 signaling pathway	0.280232	1	0.841497	1	1	1
neural precursor cell proliferation	1	0.12584	1	1	1	1
cellular copper ion homeostasis	1	0.849246	0.276593	1	1	1
mesenchyme morphogenesis	1	0.849246	0.276593	1	1	1
pericardium development	1	0.849246	0.276593	1	1	1
cellular component movement	1	0.129689	1	1	1	1
mesodermal cell differentiation	1	0.99057	0.140198	1	1	1
regulation of toll-like receptor 4 signaling pathway	0.132141	1	1	1	1	1
ventral spinal cord interneuron specification	0.132141	1	1	1	1	1
regulation of glycoprotein biosynthetic process	0.272823	1	0.945851	0.913922	1	1
ovulation cycle process	0.964755	1	0.169715	1	1	1
endocardial cushion morphogenesis	1	1	0.136379	1	1	1
negative regulation by host of viral transcription	1	1	0.136379	1	1	1
negative regulation of catenin import into nucleus	1	1	0.136379	1	1	1
type B pancreatic cell differentiation	1	1	0.136379	1	1	1
cardiac septum morphogenesis	1	1	0.14472	1	1	1
negative regulation of cell activation	1	0.145225	1	1	1	1
regulation of histone phosphorylation	1	0.152816	1	1	1	0.997257
regulation of toll-like receptor signaling pathway	0.151503	1	1	1	1	1
cell migration in hindbrain	1	0.152816	1	1	1	1
negative regulation of secretion	1	0.153222	1	1	1	1
regulation of Notch signaling pathway	1	0.153222	1	1	1	1
GTP catabolic process	0.232475	1	0.925292	1	1	1
female gonad development	0.898005	1	0.265317	1	1	1
regulation of bone resorption	1	0.167404	1	1	1	1
regulation of macrophage activation	0.242573	1	0.925292	1	1	1
activation of adenylate cyclase activity by dopamine receptor signaling pathway	0.167964	1	1	1	1	1
diaphragm development	0.167964	1	1	1	1	1
Clara cell differentiation	1	1	0.169176	1	1	1
metanephric glomerular capillary formation	1	1	0.169176	1	1	1
negative regulation of acute inflammatory response to antigenic stimulus	1	1	0.169176	1	1	1
outflow tract septum morphogenesis	1	1	0.169176	1	1	1
protein O-linked glycosylation via serine	1	1	0.169176	1	1	1
protein O-linked glycosylation via threonine	1	1	0.169176	1	1	1
response to iron(II) ion	1	1	0.169176	1	1	1
localization	1	0.173898	1	1	1	1
positive regulation of pathway-restricted SMAD protein phosphorylation	1	1	0.178995	1	1	1
regulation of gluconeogenesis	1	1	0.178995	1	1	1
cardiac left ventricle morphogenesis	1	0.184038	1	1	1	1
glial cell differentiation	0.203975	0.99057	1	0.995441	1	1
glutaminyl-tRNAGln biosynthesis via transamidation	0.195252	1	1	1	1	1
heparan sulfate proteoglycan biosynthetic process, enzymatic modification	0.195252	1	1	1	1	1
positive regulation of histone H3-K9 methylation	0.195252	1	1	1	1	1
positive regulation of immature T cell proliferation in thymus	0.195252	1	1	1	1	1
positive regulation of macrophage activation	0.195252	1	1	1	1	1
positive regulation of oocyte development	0.195252	1	1	1	1	1
positive regulation of toll-like receptor 3 signaling pathway	0.195252	1	1	1	1	1
pyrimidine deoxyribonucleoside metabolic process	0.195252	1	1	1	1	1
regulation of interleukin-10 biosynthetic process	0.195252	1	1	1	1	1
regulation of Schwann cell differentiation	0.195252	1	1	1	1	1
neural crest cell migration	0.918959	0.280304	1	1	1	1
response to amino acid stimulus	1	1	0.199707	1	1	1
endoderm formation	1	1	0.203579	1	1	1
negative regulation of viral transcription	1	1	0.203579	1	1	1
Wnt receptor signaling pathway, calcium modulating pathway	1	1	0.203579	1	1	1
dentate gyrus development	1	0.205693	1	1	1	1
forebrain neuroblast division	1	0.205693	1	1	1	1
negative regulation of lymphocyte activation	1	0.205693	1	1	1	1
positive regulation of Notch signaling pathway	1	0.205693	1	1	1	1
protein targeting to ER	1	0.205693	1	1	1	1
regulation of timing of cell differentiation	1	0.205693	1	1	1	1
positive regulation of cell growth	1	0.212123	1	1	1	1
retrograde transport, vesicle recycling within Golgi	0.213182	1	1	1	1	1
regulation of pathway-restricted SMAD protein phosphorylation	1	1	0.276593	0.93769	1	1
positive regulation of endocytosis	0.272823	1	0.944019	1	1	1
netrin-activated signaling pathway	0.280232	1	1	0.936729	1	1
positive regulation of JNK cascade	0.280232	1	1	0.936729	1	1
positive regulation of smooth muscle cell differentiation	0.280232	1	1	0.936729	1	1
regulation of oocyte development	0.280232	1	1	0.936729	1	1
regulation of myeloid cell differentiation	1	0.218703	1	1	1	1
regulation of interferon-gamma production	1	0.218785	1	1	1	1
cellular response to acid	1	1	0.225967	1	1	1
preganglionic parasympathetic nervous system development	1	0.234286	1	1	1	1
regulation of interleukin-13 production	1	0.234286	1	1	1	1
response to folic acid	1	0.234286	1	1	1	1
response to prostaglandin E stimulus	1	0.234286	1	1	1	1
negative regulation of phospholipid biosynthetic process	1	1	1	0.237974	1	1
positive regulation of mitotic cell cycle spindle assembly checkpoint	1	1	1	0.237974	1	1
mitochondrial translation	0.238995	1	1	1	1	1
purine-containing compound catabolic process	0.238995	1	1	1	1	1
regulation of epithelial cell proliferation involved in prostate gland development	0.238995	1	1	1	1	1
ephrin receptor signaling pathway	1	0.242345	1	1	1	1
positive regulation of myeloid leukocyte differentiation	1	0.242345	1	1	1	1
regulation of symbiosis, encompassing mutualism through parasitism	0.242573	1	1	1	1	1
germ cell programmed cell death	1	1	0.251634	1	1	1
glomerular capillary formation	1	1	0.251634	1	1	1
male genitalia development	1	1	0.251634	1	1	1
mammary gland specification	1	1	0.251634	1	1	1
modification by host of symbiont morphology or physiology	1	1	0.251634	1	1	1
negative regulation of amino acid transport	1	1	0.251634	1	1	1
negative regulation of cell adhesion mediated by integrin	1	1	0.251634	1	1	1
negative regulation of membrane protein ectodomain proteolysis	1	1	0.251634	1	1	1
nucleotide-excision repair, DNA damage removal	1	1	0.251634	1	1	1
ovulation cycle	1	1	0.251634	1	1	1
response to nitrosative stress	1	1	0.251634	1	1	1
thymus development	0.254029	1	1	1	1	1
positive regulation of leukocyte chemotaxis	0.255772	1	1	1	1	1
granulocyte differentiation	1	0.25697	1	1	1	1
midbrain-hindbrain boundary development	1	0.25697	1	1	1	1
muscle cell fate commitment	1	0.25697	1	1	1	1
ribonucleotide biosynthetic process	1	0.260752	1	1	1	1
adrenal chromaffin cell differentiation	1	0.266724	1	1	1	1
autophagic vacuole fusion	1	0.266724	1	1	1	1
B cell activation	1	0.266724	1	1	1	1
branching involved in open tracheal system development	1	0.266724	1	1	1	1
canonical Wnt receptor signaling pathway involved in cardiac neural crest cell differentiation involved in heart development	1	0.266724	1	1	1	1
carotid body glomus cell differentiation	1	0.266724	1	1	1	1
cellular response to BMP stimulus	1	0.266724	1	1	1	1
cellular response to magnetism	1	0.266724	1	1	1	1
chemokine (C-C motif) ligand 11 production	1	0.266724	1	1	1	1
ciliary receptor clustering involved in smoothened signaling pathway	1	0.266724	1	1	1	1
defense response to nematode	1	0.266724	1	1	1	1
detection of cell density by contact stimulus involved in contact inhibition	1	0.266724	1	1	1	1
detection of wounding	1	0.266724	1	1	1	1
diadenosine triphosphate catabolic process	1	0.266724	1	1	1	1
embryonic ectodermal digestive tract morphogenesis	1	0.266724	1	1	1	1
enteric smooth muscle cell differentiation	1	0.266724	1	1	1	1
globoside metabolic process	1	0.266724	1	1	1	1
interleukin-4-dependent isotype switching to IgE isotypes	1	0.266724	1	1	1	1
lateral inhibition	1	0.266724	1	1	1	1
lateral mesodermal cell differentiation	1	0.266724	1	1	1	1
leukocyte chemotaxis	1	0.266724	1	1	1	1
lung neuroendocrine cell differentiation	1	0.266724	1	1	1	1
lysosomal lumen pH elevation	1	0.266724	1	1	1	1
memory T cell activation	1	0.266724	1	1	1	1
mesenchymal to epithelial transition involved in metanephric renal vesicle formation	1	0.266724	1	1	1	1
mesenchyme migration	1	0.266724	1	1	1	1
mitochondrion degradation by induced vacuole formation	1	0.266724	1	1	1	1
negative regulation of canonical Wnt receptor signaling pathway involved in controlling type B pancreatic cell proliferation	1	0.266724	1	1	1	1
negative regulation of fat cell proliferation	1	0.266724	1	1	1	1
negative regulation of fibroblast apoptosis	1	0.266724	1	1	1	1
negative regulation of forebrain neuron differentiation	1	0.266724	1	1	1	1
negative regulation of oligodendrocyte differentiation	1	0.266724	1	1	1	1
negative regulation of oxidative phosphorylation uncoupler activity	1	0.266724	1	1	1	1
negative regulation of pancreatic A cell differentiation	1	0.266724	1	1	1	1
negative regulation of peroxisome proliferator activated receptor signaling pathway	1	0.266724	1	1	1	1
negative regulation of planar cell polarity pathway involved in cardiac muscle tissue morphogenesis	1	0.266724	1	1	1	1
negative regulation of planar cell polarity pathway involved in cardiac right atrium morphogenesis	1	0.266724	1	1	1	1
negative regulation of planar cell polarity pathway involved in neural tube closure	1	0.266724	1	1	1	1
negative regulation of planar cell polarity pathway involved in outflow tract morphogenesis	1	0.266724	1	1	1	1
negative regulation of planar cell polarity pathway involved in pericardium morphogenesis	1	0.266724	1	1	1	1
negative regulation of planar cell polarity pathway involved in ventricular septum morphogenesis	1	0.266724	1	1	1	1
negative regulation of stomach neuroendocrine cell differentiation	1	0.266724	1	1	1	1
neural plate axis specification	1	0.266724	1	1	1	1
neuroblast fate determination	1	0.266724	1	1	1	1
noradrenergic neuron fate commitment	1	0.266724	1	1	1	1
notochord cell development	1	0.266724	1	1	1	1
odontoblast differentiation	1	0.266724	1	1	1	1
parasympathetic nervous system development	1	0.266724	1	1	1	1
phagocytosis	1	0.266724	1	1	1	1
positive regulation of fibroblast apoptosis	1	0.266724	1	1	1	1
positive regulation of homeostatic process	1	0.266724	1	1	1	1
positive regulation of T cell costimulation	1	0.266724	1	1	1	1
positive regulation of Wnt receptor signaling pathway involved in dorsal/ventral axis specification	1	0.266724	1	1	1	1
regulation of timing of subpallium neuron differentiation	1	0.266724	1	1	1	1
right lung morphogenesis	1	0.266724	1	1	1	1
spleen trabecula formation	1	0.266724	1	1	1	1
SRP-dependent cotranslational protein targeting to membrane, signal sequence recognition	1	0.266724	1	1	1	1
SRP-dependent cotranslational protein targeting to membrane, translocation	1	0.266724	1	1	1	1
stomach neuroendocrine cell differentiation	1	0.266724	1	1	1	1
stromal-epithelial cell signaling involved in prostate gland development	1	0.266724	1	1	1	1
subpallium neuron fate commitment	1	0.266724	1	1	1	1
T-helper 2 cell activation	1	0.266724	1	1	1	1
tyrosine biosynthetic process	1	0.266724	1	1	1	1
ventral midline determination	1	0.266724	1	1	1	1
mammary gland epithelial cell differentiation	1	0.270974	1	1	1	1
response to prostaglandin stimulus	1	0.270974	1	1	1	1
negative regulation of binding	1	1	0.271417	1	1	1
regulation of interleukin-8 production	0.272823	1	1	1	1	1
response to acid	1	1	0.276276	1	1	1
response to amine stimulus	1	1	0.276593	1	1	1
regulation of intracellular protein kinase cascade	0.294549	1	0.989153	0.995441	1	1
peroxisome fission	0.280232	1	1	1	1	1
positive regulation of immature T cell proliferation	0.280232	1	1	1	1	1
positive regulation of killing of cells of other organism	0.280232	1	1	1	1	1
positive regulation of positive chemotaxis	0.292519	1	0.990782	1	1	1
purine nucleotide catabolic process	0.287257	1	1	1	1	1
regulation of osteoclast differentiation	1	0.296986	1	1	1	1

## Sheet: GO Cellular Component
Description	Complex	Merge	Non-Differential	Shifted	Split	Strength Change
cell projection	0.831687	0.120833	0.753436	1	1	0.597961
neuron projection	0.836567	0.375166	1	1	1	0.248677
integral to plasma membrane	1	0.0290525	1	1	1	1
intrinsic to plasma membrane	1	0.0290525	1	1	1	1
plasma membrane part	1	0.237733	1	1	1	1
Ndc80 complex	1	0.287524	1	1	1	1

## Sheet: GO Molecular Function
Description	Complex	Merge	Non-Differential	Shifted	Split	Strength Change

## Sheet: MSigDB Pathway
Description	Complex	Merge	Non-Differential	Shifted	Split	Strength Change
Genes involved in Axon guidance	0.795178	0.962763	0.0441421	0.787727	0.256605	0.0333855
Genes involved in NCAM signaling for neurite out-growth	0.790509	0.797225	0.0441421	0.689681	0.256605	0.384467
Fc gamma R-mediated phagocytosis	0.576274	1	0.633745	0.689681	0.317205	0.157464
Fc epsilon RI signaling pathway	0.545013	0.991242	0.7286	0.689681	0.256605	0.253144
Axon guidance	0.42728	0.797225	0.724344	0.891417	0.36962	0.279256
Genes involved in Activation of the AP-1 family of transcription factors	0.790509	0.962763	0.392457	0.749327	0.256605	0.384467
Calcium signaling pathway	0.715935	1	0.207115	0.867827	0.342258	0.528353
Genes involved in MAPK targets/Nuclear events mediated by MAP kinases	0.934518	0.962763	0.392457	0.787727	0.256605	0.369012
Genes involved in Nuclear Receptor transcription pathway	0.620137	0.991242	0.819641	0.689681	0.317205	0.279256
Genes involved in CD28 dependent Vav1 pathway	0.790509	0.962763	0.708385	0.767358	0.267707	0.384467
Prion diseases	0.982074	0.991242	0.708385	0.689681	0.256605	0.412761
Genes involved in NCAM1 interactions	0.893699	0.991242	0.0768164	0.736852	0.493451	0.861304
Genes involved in Amine ligand-binding receptors	1	0.991242	0.0732785	0.891417	0.477964	0.830495
Genes involved in Semaphorin interactions	1	1	0.659952	1	0.68471	0.157464

## Sheet: BioCyc Pathway
Description	Complex	Merge	Non-Differential	Shifted	Split	Strength Change
citrulline-nitric oxide cycle	1	1	1	1	1	0.279741

## Sheet: PANTHER Pathway
Description	Complex	Merge	Non-Differential	Shifted	Split	Strength Change
Integrin signalling pathway	0.490755	0.555523	0.405864	0.354364	0.0808267	0.201758
TGF-beta signaling pathway	0.896807	0.555523	0.0169482	0.359433	0.222683	0.238928
Ras Pathway	0.494339	0.555523	0.546418	0.354364	0.282883	0.36372
Axon guidance mediated by Slit/Robo	0.512815	0.555523	0.824407	0.520108	0.239678	0.218044
Alzheimer disease-amyloid secretase pathway	0.490755	0.632156	0.949538	0.520108	0.282883	0.201758
5HT4 type receptor mediated signaling pathway	1	0.632156	1	0.477792	0.741656	0.201758
T cell activation	0.490755	0.943977	0.931028	0.894876	0.645834	0.201758
B cell activation	0.583085	0.83787	1	1	0.538442	0.201758
5HT1 type receptor mediated signaling pathway	1	0.637344	1	0.520108	0.804418	0.201758
Axon guidance mediated by netrin	0.0877773	0.943977	0.718534	1	0.741656	0.772921
Histamine H2 receptor mediated signaling pathway	1	0.922419	1	0.359083	0.741656	0.283583
Axon guidance mediated by semaphorins	1	0.901097	0.683745	0.986953	0.741656	0.238928
Allantoin degradation	1	1	1	1	1	0.201758
