# Supplementary material for: TADCompare: An R Package for Differential and Temporal Analysis of Topologically Associated Domains
Source: Front Genet. 2020 Mar 10;11:158. doi: 10.3389/fgene.2020.00158 (PMC7076128; doi:10.3389/fgene.2020.00158)
Supplement: Supplementary Table 5 — Gene ontology enrichment between the first and last time points in auxin-treated data. Differential boundaries were identified between the first and last time points of auxin-treated data (Rao et al., 2017). Pathway analysis was performed using rGREAT (Methods), and results are separated by ontology. Boundaries with an FDR adjusted p-value of <0.3 are shown. 50 kb resolution, chr 1–22. [file Table_5.XLSX]

## Sheet: BioCyc Pathway
Description	Complex	Merge	Non-Differential	Shifted	Split	Strength Change

## Sheet: GO Biological Process
Description	Complex	Merge	Non-Differential	Shifted	Split	Strength Change
odontogenesis of dentine-containing tooth	0.280641	1	1	0.49689	1	1
response to growth factor stimulus	0.213022	0.734731	1	1	1	1
mesenchymal cell differentiation	0.245445	0.734731	1	1	1	1
organ morphogenesis	0.0144066	0.983518	1	1	1	1
cell development	0.00743903	1	1	1	1	1
cell morphogenesis	0.00743903	1	1	1	1	1
limb development	0.00743903	1	1	1	1	1
limb morphogenesis	0.00743903	1	1	1	1	1
positive regulation of macromolecule biosynthetic process	0.00921114	1	1	1	1	1
cell morphogenesis involved in differentiation	0.00963508	1	1	1	1	1
regulation of chondrocyte differentiation	0.00963508	1	1	1	1	1
cellular component morphogenesis	0.0120984	1	1	1	1	1
anatomical structure morphogenesis	0.0137183	1	1	1	1	1
ear development	0.0144066	1	1	1	1	1
positive regulation of bone mineralization	0.0144066	1	1	1	1	1
renal system development	0.0144066	1	1	1	1	1
sensory organ development	0.0144066	1	1	1	1	1
positive regulation of transcription, DNA-dependent	0.0145361	1	1	1	1	1
positive regulation of gene expression	0.015354	1	1	1	1	1
kidney development	0.0164527	1	1	1	1	1
positive regulation of biomineral tissue development	0.0164527	1	1	1	1	1
positive regulation of cellular biosynthetic process	0.0164527	1	1	1	1	1
positive regulation of ossification	0.0164527	1	1	1	1	1
positive regulation of biosynthetic process	0.02248	1	1	1	1	1
embryonic limb morphogenesis	0.0251972	1	1	1	1	1
embryonic organ morphogenesis	0.0255046	1	1	1	1	1
negative regulation of transcription from RNA polymerase II promoter	0.0255046	1	1	1	1	1
pattern specification process	0.0255046	1	1	1	1	1
positive regulation of RNA metabolic process	0.0255046	1	1	1	1	1
skeletal system morphogenesis	0.0255046	1	1	1	1	1
urogenital system development	0.0255046	1	1	1	1	1
ureteric bud development	0.0293976	1	1	1	1	1
neuron differentiation	0.0297356	1	1	1	1	1
skeletal system development	0.0297356	1	1	1	1	1
negative regulation of chondrocyte differentiation	0.0346477	1	1	1	1	1
regulation of cartilage development	0.0346477	1	1	1	1	1
positive regulation of nucleobase-containing compound metabolic process	0.0414406	1	1	1	1	1
positive regulation of macromolecule metabolic process	0.0433496	1	1	1	1	1
positive regulation of nitrogen compound metabolic process	0.0433496	1	1	1	1	1
central nervous system development	0.0441747	1	1	1	1	1
embryonic organ development	0.0447919	1	1	1	1	1
regulation of mesenchymal cell proliferation	0.0447919	1	1	1	1	1
embryonic morphogenesis	0.0627829	0.983518	1	1	1	1
amine metabolic process	0.119176	0.928058	1	1	1	1
mesenchyme development	0.17461	0.877872	1	1	1	1
ear morphogenesis	0.0566141	1	1	1	1	1
inner ear development	0.0620577	1	1	1	1	1
positive regulation of chondrocyte differentiation	0.0627274	1	1	1	1	1
regulation of bone mineralization	0.0627829	1	1	1	1	1
regulation of cellular process	0.0636366	1	1	1	1	1
palate development	0.0667953	1	1	1	1	1
metabolic process	0.0822455	1	1	1	1	1
regionalization	0.0827526	1	1	1	1	1
ureteric bud morphogenesis	0.156088	0.928058	1	1	1	1
embryo development	0.086764	1	1	1	1	1
metanephric nephron development	0.086764	1	1	1	1	1
regulation of organ growth	0.086764	1	1	1	1	1
neuron development	0.0868368	1	1	1	1	1
bone development	0.0962959	1	1	1	1	1
metanephric nephron morphogenesis	0.0984981	1	1	1	1	1
bone morphogenesis	0.0989641	1	1	1	1	1
cell fate commitment	0.0989641	1	1	1	1	1
endochondral bone morphogenesis	0.0989641	1	1	1	1	1
negative regulation of RNA metabolic process	0.0989641	1	1	1	1	1
nephron morphogenesis	0.0989641	1	1	1	1	1
regulation of biomineral tissue development	0.0989641	1	1	1	1	1
development of primary sexual characteristics	0.0995939	1	1	1	1	1
sex differentiation	0.0995939	1	1	1	1	1
cell projection morphogenesis	0.101365	1	1	1	1	1
camera-type eye development	0.106384	1	1	1	1	1
morphogenesis of an epithelium	0.106384	1	1	1	1	1
negative regulation of cell proliferation	0.106384	1	1	1	1	1
prostate gland epithelium morphogenesis	0.106384	1	1	1	1	1
reproductive structure development	0.106384	1	1	1	1	1
digestive system development	0.10872	1	1	1	1	1
neurogenesis	0.10872	1	1	1	1	1
regulation of RNA metabolic process	0.10872	1	1	1	1	1
tube development	0.111514	1	1	1	1	1
cell differentiation involved in kidney development	0.112853	1	1	1	1	1
cell morphogenesis involved in neuron differentiation	0.112853	1	1	1	1	1
cell part morphogenesis	0.112853	1	1	1	1	1
cellular component organization	0.112853	1	1	1	1	1
cellular metabolic process	0.112853	1	1	1	1	1
developmental growth	0.112853	1	1	1	1	1
dorsal/ventral pattern formation	0.112853	1	1	1	1	1
eye development	0.112853	1	1	1	1	1
kidney epithelium development	0.112853	1	1	1	1	1
negative regulation of transcription, DNA-dependent	0.112853	1	1	1	1	1
otic vesicle formation	0.112853	1	1	1	1	1
positive regulation of cartilage development	0.112853	1	1	1	1	1
positive regulation of cellular metabolic process	0.112853	1	1	1	1	1
positive regulation of cellular process	0.112853	1	1	1	1	1
prostate gland morphogenesis	0.112853	1	1	1	1	1
regulation of signaling	0.112853	1	1	1	1	1
regulation of transcription, DNA-dependent	0.112853	1	1	1	1	1
tube morphogenesis	0.112853	1	1	1	1	1
ventricular cardiac muscle cell differentiation	0.112853	1	1	1	1	1
generation of neurons	0.113976	1	1	1	1	1
negative regulation of nucleobase-containing compound metabolic process	0.113976	1	1	1	1	1
retina development in camera-type eye	0.113976	1	1	1	1	1
regulation of cellular macromolecule biosynthetic process	0.114759	1	1	1	1	1
axonogenesis	0.116941	1	1	1	1	1
cell projection organization	0.117181	1	1	1	1	1
digestive tract development	0.117181	1	1	1	1	1
negative regulation of cellular metabolic process	0.117181	1	1	1	1	1
neuron projection morphogenesis	0.117181	1	1	1	1	1
positive regulation of biological process	0.117181	1	1	1	1	1
organ development	0.190129	0.928058	1	1	1	1
embryonic digit morphogenesis	0.118422	1	1	1	1	1
metanephros morphogenesis	0.12123	1	1	1	1	1
glycosaminoglycan metabolic process	0.123865	1	1	1	1	1
negative regulation of nitrogen compound metabolic process	0.123865	1	1	1	1	1
positive regulation of metabolic process	0.127186	1	1	1	1	1
macromolecule biosynthetic process	0.130701	1	1	1	1	1
positive regulation of transcription from RNA polymerase II promoter	0.130701	1	1	1	1	1
metanephric epithelium development	0.131534	1	1	1	1	1
negative regulation of B cell proliferation	0.131534	1	1	1	1	1
regulation of developmental process	0.131534	1	1	1	1	1
regulation of macromolecule biosynthetic process	0.131534	1	1	1	1	1
epithelial tube morphogenesis	0.135954	1	1	1	1	1
misfolded or incompletely synthesized protein catabolic process	0.136801	1	1	1	1	1
regulation of signal transduction	0.143163	1	1	1	1	1
cellular process	0.150036	1	1	1	1	1
anterior/posterior pattern specification involved in kidney development	0.152188	1	1	1	1	1
cerebellum vasculature morphogenesis	0.152188	1	1	1	1	1
ER-associated misfolded protein catabolic process	0.152188	1	1	1	1	1
eye morphogenesis	0.152188	1	1	1	1	1
intermediate mesoderm development	0.152188	1	1	1	1	1
posterior mesonephric tubule development	0.152188	1	1	1	1	1
ureter urothelium development	0.152188	1	1	1	1	1
negative regulation of adenylate cyclase activity	1	1	0.153771	1	1	1
negative regulation of lyase activity	1	1	0.153771	1	1	1
regulation of adenylate cyclase activity	1	1	0.153771	1	1	1
regulation of cyclase activity	1	1	0.153771	1	1	1
regulation of lyase activity	1	1	0.153771	1	1	1
regulation of nucleotide metabolic process	1	1	0.153771	1	1	1
inner ear morphogenesis	0.156088	1	1	1	1	1
nephron epithelium development	0.156088	1	1	1	1	1
morphogenesis of a branching epithelium	0.157669	1	1	1	1	1
negative regulation of epithelial cell differentiation	0.157669	1	1	1	1	1
otic vesicle development	0.157669	1	1	1	1	1
ventricular cardiac muscle cell development	0.157669	1	1	1	1	1
negative regulation of cellular biosynthetic process	0.166776	1	1	1	1	1
negative regulation of macromolecule metabolic process	0.166776	1	1	1	1	1
primary metabolic process	0.166776	1	1	1	1	1
cellular component organization or biogenesis	0.170462	1	1	1	1	1
kidney morphogenesis	0.170462	1	1	1	1	1
negative regulation of cellular macromolecule biosynthetic process	0.170462	1	1	1	1	1
positive regulation of mesenchymal cell proliferation	0.170462	1	1	1	1	1
regulation of macromolecule metabolic process	0.170462	1	1	1	1	1
regulation of sequence-specific DNA binding transcription factor activity	0.170462	1	1	1	1	1
gonad development	0.17311	1	1	1	1	1
sulfur compound metabolic process	0.176057	1	1	1	1	1
regulation of fibroblast growth factor receptor signaling pathway	0.176638	1	1	1	1	1
regulation of kidney development	0.280641	0.896581	1	1	1	1
developmental growth involved in morphogenesis	0.179612	1	1	1	1	1
neuron projection development	0.179612	1	1	1	1	1
regulation of biological process	0.179612	1	1	1	1	1
ureter development	0.179612	1	1	1	1	1
negative regulation of gene expression	0.182234	1	1	1	1	1
epithelium development	0.183905	1	1	1	1	1
regulation of transcription from RNA polymerase II promoter	0.183905	1	1	1	1	1
biosynthetic process	0.185478	1	1	1	1	1
cartilage development	0.18829	1	1	1	1	1
biological regulation	0.190129	1	1	1	1	1
cellular macromolecule metabolic process	0.190129	1	1	1	1	1
negative regulation of macromolecule biosynthetic process	0.190129	1	1	1	1	1
potassium ion transport	0.190129	1	1	1	1	1
regulation of gene expression	0.190129	1	1	1	1	1
tissue morphogenesis	0.190129	1	1	1	1	1
glomerulus development	0.190707	1	1	1	1	1
negative regulation of cell-substrate adhesion	0.190707	1	1	1	1	1
nephron epithelium morphogenesis	0.190707	1	1	1	1	1
regulation of heart growth	0.190707	1	1	1	1	1
positive regulation of developmental process	0.192595	1	1	1	1	1
brain development	0.192784	1	1	1	1	1
cellular macromolecule biosynthetic process	0.192784	1	1	1	1	1
embryonic digestive tract development	0.192784	1	1	1	1	1
genitalia development	0.192784	1	1	1	1	1
negative regulation of biosynthetic process	0.192784	1	1	1	1	1
organelle assembly	0.196464	1	1	1	1	1
tissue development	0.199887	1	1	1	1	1
regulation of cyclic nucleotide biosynthetic process	1	1	0.202703	1	1	1
morphogenesis of a branching structure	0.206791	1	1	1	1	1
B cell homeostasis	0.209213	1	1	1	1	1
regulation of alpha-beta T cell proliferation	0.209213	1	1	1	1	1
regulation of cellular biosynthetic process	0.210521	1	1	1	1	1
regulation of nucleobase-containing compound metabolic process	0.212827	1	1	1	1	1
positive regulation of insulin secretion	0.213022	1	1	1	1	1
aminoglycan metabolic process	0.217221	1	1	1	1	1
regulation of primary metabolic process	0.217221	1	1	1	1	1
epithelial cell differentiation involved in kidney development	0.223206	1	1	1	1	1
lateral sprouting from an epithelium	0.223206	1	1	1	1	1
spinal cord motor neuron cell fate specification	0.223206	1	1	1	1	1
negative regulation of metabolic process	0.226035	1	1	1	1	1
regulation of skeletal muscle tissue development	0.23527	1	1	1	1	1
multicellular organismal aging	0.244577	1	1	1	1	1
negative regulation of cellular process	0.245445	1	1	1	1	1
digestive tract morphogenesis	0.260022	1	1	1	1	1
regulation of cellular metabolic process	0.262006	1	1	1	1	1
aspartate family amino acid metabolic process	0.263775	1	1	1	1	1
C-terminal protein deglutamylation	0.263775	1	1	1	1	1
cloacal septation	0.263775	1	1	1	1	1
deltoid tuberosity development	0.263775	1	1	1	1	1
negative regulation of alpha-beta T cell proliferation	0.263775	1	1	1	1	1
negative regulation of glomerular mesangial cell proliferation	0.263775	1	1	1	1	1
negative regulation of kidney development	0.263775	1	1	1	1	1
positive regulation of alkaline phosphatase activity	0.263775	1	1	1	1	1
positive regulation of mesenchymal stem cell differentiation	0.263775	1	1	1	1	1
positive regulation of telomere maintenance via telomerase	0.263775	1	1	1	1	1
progesterone secretion	0.263775	1	1	1	1	1
prostatic bud formation	0.263775	1	1	1	1	1
protein side chain deglutamylation	0.263775	1	1	1	1	1
regulation of biosynthetic process	0.263775	1	1	1	1	1
regulation of cell proliferation	0.263775	1	1	1	1	1
retinal blood vessel morphogenesis	0.263775	1	1	1	1	1
ureter morphogenesis	0.263775	1	1	1	1	1
regulation of B cell proliferation	0.26591	1	1	1	1	1
regulation of cAMP biosynthetic process	1	1	0.266198	1	1	1
regulation of cyclic nucleotide metabolic process	1	1	0.266198	1	1	1
deoxyribonucleoside triphosphate metabolic process	0.274158	1	1	1	1	1
deoxyribonucleotide biosynthetic process	0.274158	1	1	1	1	1
DNA double-strand break processing	0.274158	1	1	1	1	1
hindgut morphogenesis	0.274158	1	1	1	1	1
middle ear morphogenesis	0.274158	1	1	1	1	1
nucleobase-containing small molecule interconversion	0.274158	1	1	1	1	1
renal tubule morphogenesis	0.274158	1	1	1	1	1
smooth muscle tissue development	0.274158	1	1	1	1	1
regulation of cAMP metabolic process	1	1	0.278754	1	1	1
cardiac cell differentiation	0.27991	1	1	1	1	1
cardiovascular system development	0.280641	1	1	1	1	1
nephron development	0.280641	1	1	1	1	1
organ formation	0.28868	1	1	1	1	1
cellular response to amino acid stimulus	0.298074	1	1	1	1	1
cellular response to starvation	0.298971	1	1	1	1	1
transcription, DNA-dependent	0.298971	1	1	1	1	1
MyD88-dependent toll-like receptor signaling pathway	0.299763	1	1	1	1	1

## Sheet: GO Cellular Component
Description	Complex	Merge	Non-Differential	Shifted	Split	Strength Change
cytoplasm	0.297302	1	1	1	1	1
intracellular	0.297302	1	1	1	1	1

## Sheet: GO Molecular Function
Description	Complex	Merge	Non-Differential	Shifted	Split	Strength Change

## Sheet: MSigDB Pathway
Description	Complex	Merge	Non-Differential	Shifted	Split	Strength Change
Genes involved in Neurotransmitter Release Cycle	1	0.171702	1	1	1	1

## Sheet: PANTHER Pathway
Description	Complex	Merge	Non-Differential	Shifted	Split	Strength Change
Glutamine glutamate conversion	1	1	1	0.157872	1	1
Formyltetrahydroformate biosynthesis	1	1	1	0.268772	1	1
